3. Avidan MS, Zhang L, Burnside BA, Finkel KJ, Searleman AC, Selvidge JA, Saager L, Turner MS, Rao S, Bottros M, Hantler C, Jacobsohn E, Evers AS: Anesthesia awareness and the bispectral index. *N Engl J Med* 2008; 358:1097–108
4. Myles PS, Leslie K, McNeil J, Forbes A, Chan MT: Bispectral index monitoring to prevent awareness during anaesthesia: The B-Aware randomised controlled trial. *Lancet* 2004; 363:1757–63
5. Myles PS, Gin T: Statistical Methods for Anaesthesia and Intensive Care, 1st edition. Edinburgh, Butterworth-Heinemann, 2000, pp 115
6. Avidan MS, Mashour GA: Prevention of intraoperative awareness with explicit recall: Making sense of the evidence. *ANESTHESIOLOGY* 2013; 118:449–56
7. Puri GD, Murthy SS: Bispectral index monitoring in patients undergoing cardiac surgery under cardiopulmonary bypass. *Eur J Anaesthesiol* 2003; 20:451–6
8. Zhang C, Xu L, Ma YQ, Sun YX, Li YH, Zhang L, Feng CS, Luo B, Zhao ZL, Guo JR, Jin YJ, Wu G, Yuan W, Yuan ZG, Yue Y: Bispectral index monitoring prevent awareness during total intravenous anesthesia: A prospective, randomized, double-blinded, multi-center controlled trial. *Chin Med J* 2011; 124:3664–9
9. Långsjö JW, Alkire MT, Kaskinoro K, Hayama H, Maksimow A, Kaisti KK, Aalto S, Aantaa R, Jääskeläinen SK, Revonsuo A, Scheinin H: Returning from oblivion: Imaging the neural core of consciousness. *J Neurosci* 2012; 32:4935–43
10. Mashour GA, Tremper KK, Avidan MS: Protocol for the “Michigan Awareness Control Study”: A prospective, randomized, controlled trial comparing electronic alerts based on bispectral index monitoring or minimum alveolar concentration for the prevention of intraoperative awareness. *BMC Anesthesiol* 2009; 9:7
11. Mashour GA, Esaki RK, Vandervest JC, Shanks A, Kheterpal S: A novel electronic algorithm for detecting potentially insufficient anesthesia: Implications for the prevention of intraoperative awareness. *J Clin Monit Comput* 2009; 23:273–7
12. Avidan MS, Jacobsohn E, Glick D, Burnside BA, Zhang L, Villafranca A, Karl L, Kamal S, Torres B, O'Connor M, Evers AS, Gradwohl S, Lin N, Palanca BJ, Mashour GA; BAG-RECALL Research Group: Prevention of intraoperative awareness in a high-risk surgical population. *N Engl J Med* 2011; 365:591–600

(Accepted for publication January 17, 2013.)

## Let's Go Down the Correct Path(way)

To the Editor:

“Acquired Liver Injury in the Intensive Care Unit” by Lescot *et al.*<sup>1</sup> is an excellent discussion of the multifaceted causes of liver injury. One correction is in order, however. The review incorrectly states that the international normalized ratio reflects intrinsic pathway activity. It is the activity of the *extrinsic* coagulation pathway, often now referred to as the tissue factor pathway, that is measured by the international normalized ratio and initiates the coagulation cascade.<sup>2</sup> An understanding of the specific pathway measured by a coagulation test is paramount to the treatment of defects secondary to liver disease. It should also be pointed out that the international normalized ratio, one component of the model for end-stage liver disease scoring used to prioritize liver transplantation waiting lists, can be highly variable depending on the laboratory analyzing the sample.<sup>3</sup>

**Matthew R. Johnson, M.D., Mark J. Rice, M.D.\*** \*University of Florida College of Medicine, Gainesville, Florida. [mrice@anest.ufl.edu](mailto:mrice@anest.ufl.edu)

## References

1. Lescot T, Karvellas C, Beaussier M, Magder S: Acquired liver injury in the intensive care unit. *ANESTHESIOLOGY* 2012; 117:898–904
2. Hoffman M: Remodeling the blood coagulation cascade. *J Thromb Thrombolysis* 2003; 16:17–20
3. Trotter JF, Brimhall B, Arjal R, Phillips C: Specific laboratory methodologies achieve higher model for endstage liver disease (MELD) scores for patients listed for liver transplantation. *Liver Transpl* 2004; 10:995–1000

(Accepted for publication January 23, 2013.)

In Reply:

We thank Drs. Johnson and Rice for correcting our inadvertent error from our article<sup>1</sup> and agree with their comments.

**Thomas Lescot, M.D., Ph.D.,\* Constantine Karvellas, M.D., F.R.C.P.C., Marc Beaussier, M.D., Ph.D., Sheldon Magder, M.D., F.R.C.P.C.** \*Royal Victoria Hospital, McGill University Health Center, Montreal, Quebec, Canada. [thomas.lescot@sat.aphp.fr](mailto:thomas.lescot@sat.aphp.fr)

## Reference

1. Lescot T, Karvellas C, Beaussier M, Magder S: Acquired liver injury in the intensive care unit. *ANESTHESIOLOGY* 2012; 117:898–904

(Accepted for publication January 23, 2013.)

## Intralipid: The New Magic Bullet in Cardioprotection?

To the Editor:

In two recent publications in *ANESTHESIOLOGY*, Dr. Eghbali's group reports the attenuation of myocardial reperfusion injury in rodents by intralipid administered on reperfusion.<sup>1,2</sup> Taken together with another study by the same group in which intralipid prevents and even rescues pulmonary hypertension,<sup>3</sup> and the serendipitous landmark discoveries of lipid rescue therapy against bupivacaine-induced cardiotoxicity first in dogs<sup>4</sup> and then humans,<sup>5</sup> intralipid appears to have become a new magic bullet for cardioprotection. Nevertheless, many questions remain. Li *et al.*<sup>2</sup> state that intralipid acts through the phosphorylation of Akt/extracellular signal-regulated kinase-1/glycogen

Research funding provided in part by the Department of Veterans Affairs, Washington, D.C. (CARA-026-10F to M.L.R.), the National Institutes of Health, Bethesda, Maryland (5R01 HL098490-03 to M.L.R. and NIH R01 HL092071 to M.V.P.), and institutional funds.
